# Supplementary material for: Isolation and Characterization of Two New Deoxynivalenol-Degrading Strains, Bacillus sp. HN117 and Bacillus sp. N22
Source: MDPI journal article supplement (doi:10.3390/toxins14110781), 2022-11-10
Supplement: s1 [file s1]

---

Supplementary Figures:

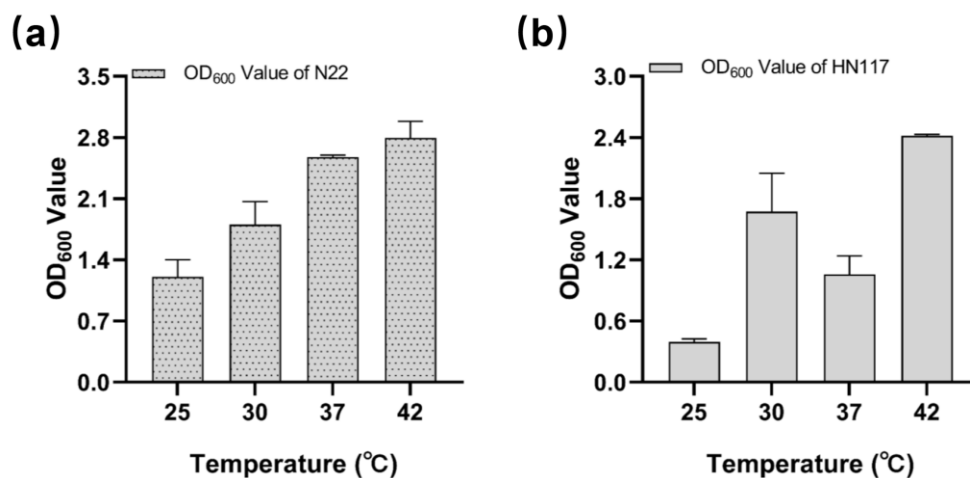

**Figure S1.** OD<sub>600</sub> value of N22 (a) and HN117 (b) at different temperatures.

**The spectra data of M-DON are as follow:** <sup>1</sup>H NMR (CD<sub>3</sub>OD, 400M) δ 6.60 (dd, J = 5.84, 1.28 Hz, 1H, H-10), 4.94 (d, J = 5.84 Hz, 1H, H-11), 4.80 (s, 1H, H-7), 4.37 (dt, J = 11.2, 4.43 Hz, 1H, H-3), 3.77 (d, J = 12.0 Hz, 1H, H-15a), 3.68 (d, J = 12.0 Hz, 1H, H-15b), 3.53 (d, J = 4.53 Hz, 1H, H-2), 3.10 (d, J = 4.38 Hz, 1H, H-13a), 3.06 (d, J = 4.38 Hz, 1H, H-13b), 2.45 (dd, J = 14.7, 4.42 Hz, 1H, H-4a), 1.96 (dd, J = 14.7, 11.2 Hz, 1H, H-4b), 1.83 (s, 3H, H-16), 1.11 (s, 3H, H-14)

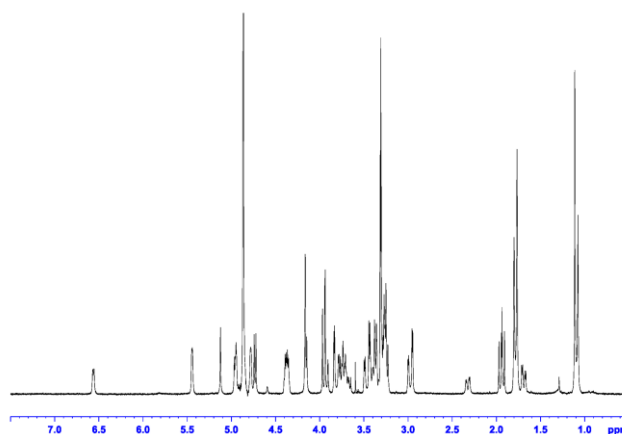

**Figure S2.** <sup>1</sup>H NMR spectra of M-DON.

---
